# Supplementary material for: Substantial Remission of Prostate Adenocarcinoma With Dendritic Cell Therapy APCEDEN ® in Combination With Chemotherapy
Source: Atypon-hosted journal article supplement (doi:10.2144/fsoa-2019-0086), 2019-10-29
Supplement: suppl [file suppl_file.pdf]

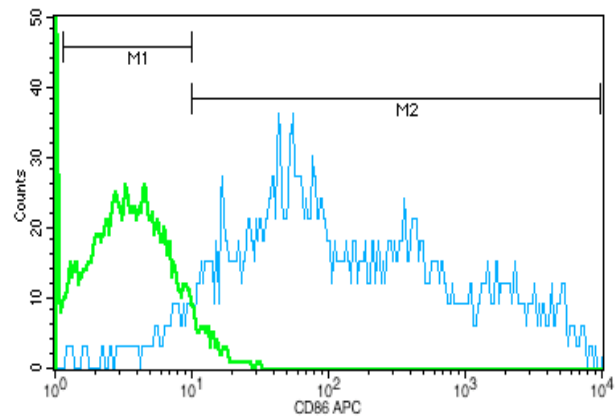

Histogram Statistics

| Marker | Events | % Gated | % Total |
|--------|--------|---------|---------|
| All    | 11067  | 100.00  | 36.89   |
| M1     | 741    | 6.70    | 2.47    |
| M2     | 10314  | 93.20   | 34.38   |

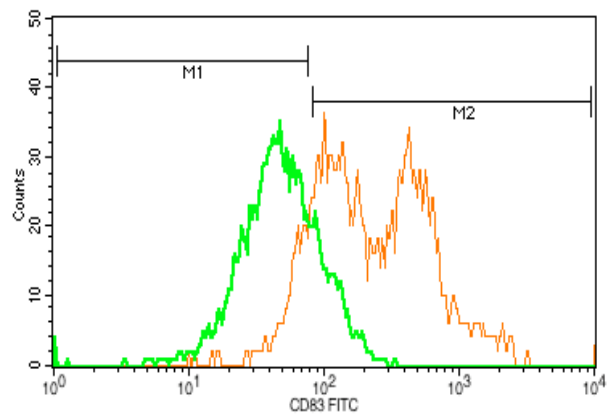

Histogram Statistics

| Marker | Events | % Gated | % Total |
|--------|--------|---------|---------|
| All    | 7378   | 100.00  | 36.89   |
| M1     | 978    | 13.26   | 4.89    |
| M2     | 6212   | 84.20   | 31.06   |

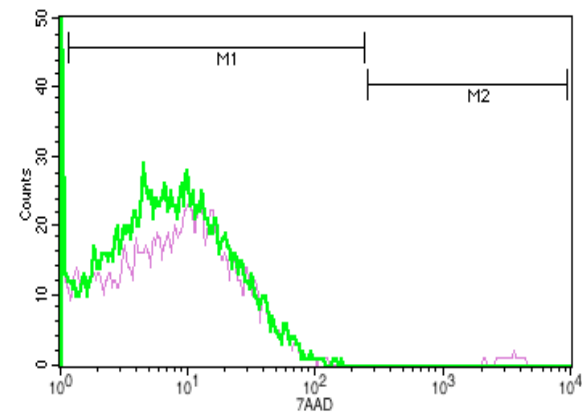

Histogram Statistics

| Marker | Events | % Gated | % Total |
|--------|--------|---------|---------|
| All    | 7490   | 100.00  | 74.90   |
| M1     | 6115   | 81.64   | 61.15   |
| M2     | 72     | 0.96    | 0.72    |

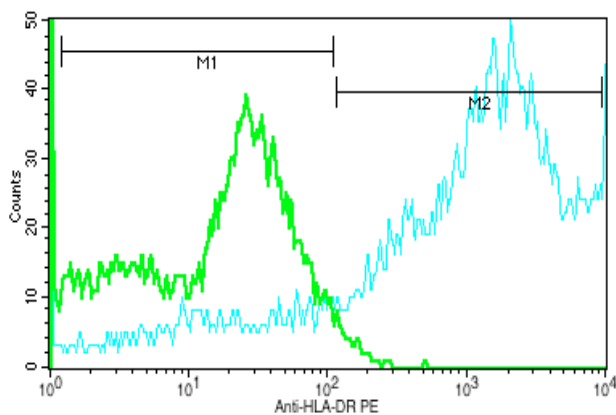

| Marker | Events | % Gated | % Total |
|--------|--------|---------|---------|
| All    | 16000  | 100.00  | 100.00  |
| M1     | 2725   | 17.03   | 17.03   |
| M2     | 12207  | 76.29   | 76.29   |

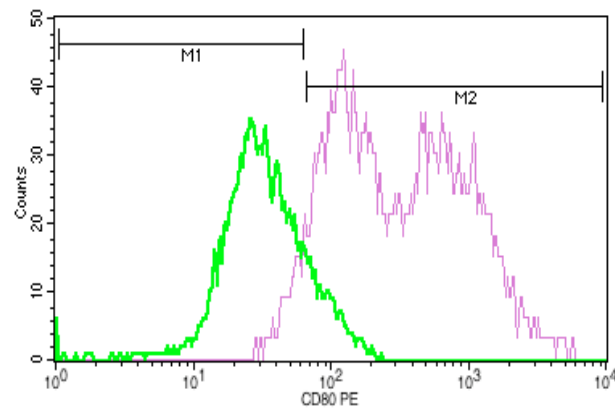

Histogram Statistics

| Marker | Events | % Gated | % Total |
|--------|--------|---------|---------|
| All    | 11067  | 100.00  | 36.89   |
| M1     | 687    | 6.21    | 2.29    |
| M2     | 10281  | 92.90   | 34.27   |
